# Supplementary material for: Genome targeting by hybrid Flp-TAL recombinases
Source: PubMed Central journal article supplement (PMC7562724; doi:10.1038/s41598-020-74474-2), 2020-10-15

## **Genome targeting by hybrid Flp-TAL recombinases**

**Eugenia Voziyanova<sup>1</sup>, Feng Li<sup>1</sup>, Riddhi Shah<sup>2</sup>, Yuri Voziyanov<sup>1\*</sup>**

<sup>1</sup> School of Biosciences, Louisiana Tech University, 1 Adams Blvd., Ruston, LA 71272, USA

<sup>2</sup> Present address:  
Department of Medicine, Columbia University Medical Center, New York, NY 10032, USA

\* To whom correspondence should be addressed:

Yuri Voziyanov  
Louisiana Tech University  
School of Biological Sciences  
1 Adams Blvd.  
Ruston, LA 71272  
USA  
Tel.: +1-318-257-2694  
Fax: +1-318-257-4574  
E-mail: [voziyan@latech.edu](mailto:voziyan@latech.edu)

**Supplementary Note 1. Target specificity of Flp-TAL recombinases, the Flp module of which can recombine multiple *FRT*-like sequences.**

Target specificity of the hybrid Flp-TAL recombinases is the product of target specificity of the TAL and the Flp modules. For the sake of this analysis, we consider target specificity of the TAL modules a fixed value and estimate the overall specificity of Flp-TAL that contain the Flp module with broad target specificity by assessing the probability to find an *FRT*-like sequence between two binding sequences for the TAL modules (see Figs. 1 and 2).

Target specificity of the Flp module that is capable of recombining several *FRT*-like sequences can be estimated based on the sequence characteristics of the *FRT*-like sequences that differ them from random DNA sequences. In mammalian genomes, these sequence characteristics translate into one *FRT*-like sequence per about 5,000 base pairs (Shultz et al., 2011). As such, the probability to find an *FRT*-like sequence between the two sequences for the TAL modules is  $\sim 1/5,000$ . Consequently, the target specificity of Flp-TAL should be about three orders of magnitude higher than that of the TAL modules.

Additionally, we have to consider the important property of the Flp/*FRT* system that depends on the spacer sequence of the recombination target to function: only the targets with the same spacers will efficiently recombine with each other while the targets with different spacers will not. Since *FRT* has an 8-bp spacer, the probability to find a spacer sequence of this length is  $1/4^8$  (or  $1/65,536$ ). For the high-scoring *FRT*-like sequences this probability is higher since the first and the last base pairs of the spacer in these sequences are invariant: T/A and A/T, respectively, and the G/C content of the spacer is set to be equal or lower than 50% (Shultz et al., 2011). Collectively, these spacer features increase the probability to find two *FRT*-like sequences with the same spacer to  $1/4^6/2$  (or  $\sim 1/2,000$ ).

Taken together, the theoretical probability to find an *FRT*-like sequence with a unique spacer between two TAL binding sequences is  $\sim 1/10^7$  ( $\sim 1/(5 \times 10^3) \times \sim 1/(2 \times 10^3)$ ). Such low probability should ensure that the TAL-guided Flp variant with broad target specificity will recombine just the *FRT*-like sequence of interest. This, of course, can only be realized if the Flp module is not sufficiently active to recombine the *FRT*-like sequences on its own, without being stabilized on the target by the TAL module.

... ATCCTACATAAATAGACGCATA **GGTACC**  
**GGATCAGGCGGAAGCGGAGGCTCAGGCGGAAGCGGCACATCA**  
 GTGGATCTACGCACGCTCGGCTACAGTC ...

**Supplementary Figure 1.** Sequence of the fusion between the Flp and the TAL genes.

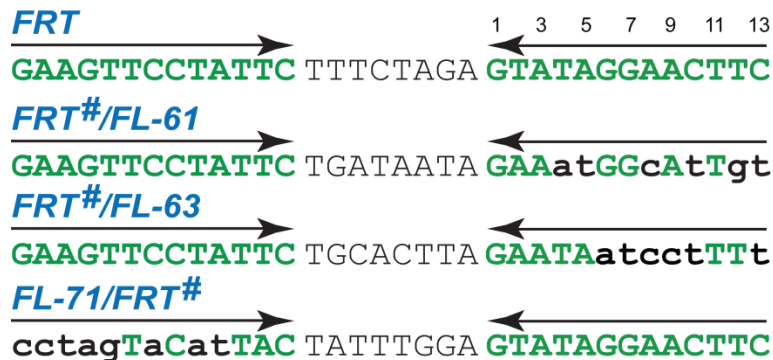

**Supplementary Figure 2.** Hybrid *FRT*<sup>#</sup>/*FL-61*, *FRT*<sup>#</sup>/*FL-63*, and *FL-71*/*FRT*<sup>#</sup> sequences. *FRT* is shown above the sequences for comparison.

| Colony color | Recombinases |          |          |          |
|--------------|--------------|----------|----------|----------|
|              | FV61-TAL     | FV63-TAL | FV71-TAL | Control  |
| Red          | 80±33        | 125±36   | 94±29    | 52±22    |
| Green        | 885±201      | 493±114  | 295±54   | 1240±146 |
| Red/Green    | 381±117      | 750±129  | 334±39   | 1100±186 |
| Colorless    | 386±91       | 325±48   | 154±48   | 149±43   |

**Supplementary Table 1.** Average number of colony types in the integration experiments performed with the FV61-TAL, FV63-TAL, and FV71-TAL recombinases. Control experiments were performed with the recombinase R1-6 (Voziyanova et al., 2015), which cannot recognize the *FRT*-like sequences in pTarget. The integration experiments were performed in three biological replicates with the same batch of the vectors.

|                      | Recombinases |          |          |
|----------------------|--------------|----------|----------|
|                      | FV61-TAL     | FV63-TAL | FV71-TAL |
| Integration-positive | 9 (81)       | 7 (73)   | 5 (80)   |
| colonies             | 8 (67)       | 9 (76)   | 3 (77)   |

**Supplementary Table 2.** Fraction of the integration-positive colonies obtained in the FV61-TAL, FV63-TAL, and FV71-TAL experiments. The number of the integration-positive colonies are shown and the total number of the hygromycin-resistant colonies of the respective color analyzed (red in the FV61-TAL and FV63-TAL experiments and green in the FV71-TAL experiments) are given in parenthesis.

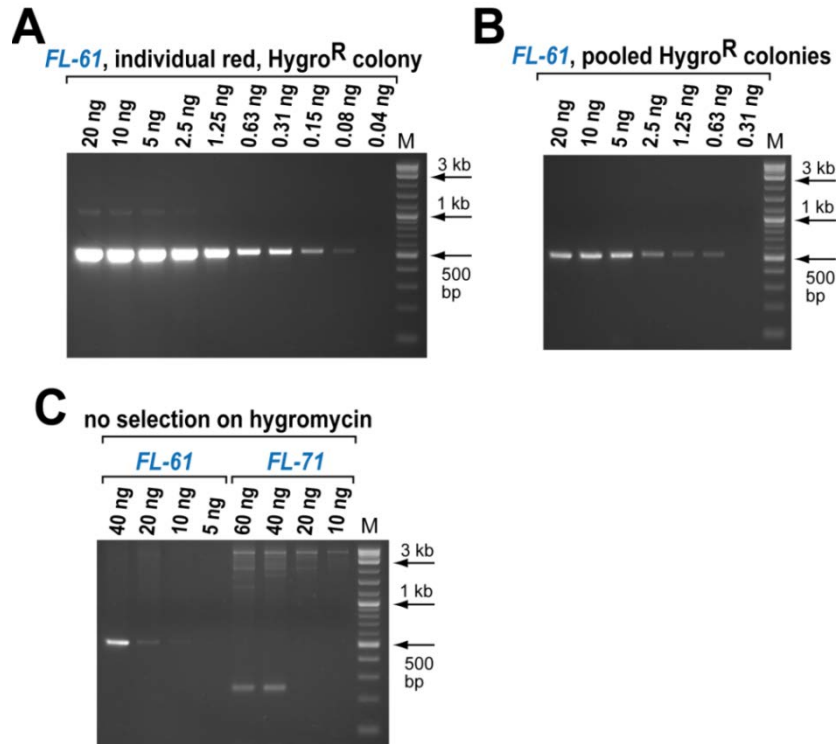

**Supplementary Figure 3.** PCR-based assessment of the Flp-TAL integration efficiency. PCR analyses of (A) genomic DNA isolated from individual hygromycin-resistance, integration-positive colony, (B) from the pooled hygromycin-resistance colonies that were generated in the *FL-61* targeting experiments (see Fig. 4), and (C) from pooled cells that were co-transfected with pTarget and FV61-TAL and FV71-TAL, respectively, and then expanded in the growth medium without hygromycin. The PCR analyses were performed at the right junction between the integrated pTarget and genome DNA (Fig. 4). M, 2-log DNA ladder (NEB).

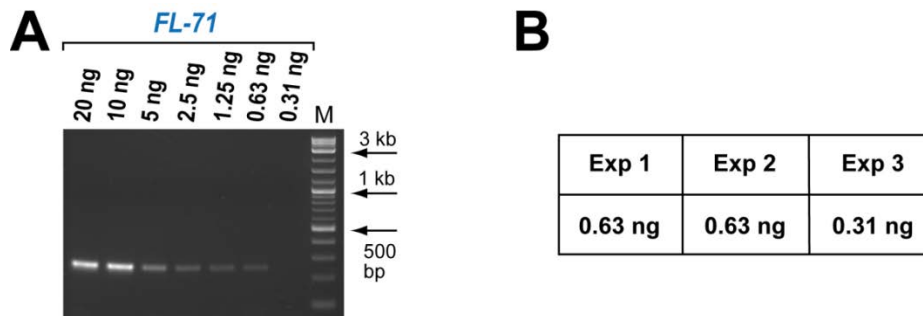

**Supplementary Figure 4.** PCR-based assessment of the deletion activity of FV71-TAL. (A) PCR analysis of genomic DNA isolated from the *FL-61* integration-positive cells that were transfected with FV71-TAL (see Fig. 4a). (B) The experiments were performed in three biological replicates; the results of these experiments are indicated. The PCR analyses were

performed at the right junction between the integrated pTarget and genome DNA (see Fig. 6b).  
M, 2-log DNA ladder (NEB).

**Supplementary Table 3. Oligonucleotide pairs that were used to PCR amplify control DNA fragments in the targeting experiments in human cells**

| Region                                                                                                                                                                                                                                                                                                                                                                                                                                                                                                                                                                                                                                                                                                                                                                   | Oligonucleotide sequence |
|--------------------------------------------------------------------------------------------------------------------------------------------------------------------------------------------------------------------------------------------------------------------------------------------------------------------------------------------------------------------------------------------------------------------------------------------------------------------------------------------------------------------------------------------------------------------------------------------------------------------------------------------------------------------------------------------------------------------------------------------------------------------------|--------------------------|
| <p style="text-align: center;"><b>Left Junction</b></p> <p><i>FL-61</i></p> <p>GTATCCAAGACTGTATTTCTGATTTTATCGTACC<br/>(anneals at ~90 bp upstream of <i>FL-61</i>)<br/>CCTCGAACTTCACCTCGGCGGGTCTTGAGTTG<br/>(anneals in the middle of the EGFP gene in pTarget)</p> <p><i>FL-63</i></p> <p>CTGATAGGCACTGACTCTCTGTCCCTTGGGCTG<br/>(anneals at ~550 bp upstream of <i>FL-63</i>)<br/>CCTCGAACTTCACCTCGGCGGGTCTTGAGTTG<br/>(anneals in the middle of the EGFP gene in pTarget)</p> <p><i>FL-71</i></p> <p>GGTTAAGTTCATGTCATAGGAAGGGGATAAGTAACAGGG<br/>(anneals at ~280 bp upstream of <i>FL-71</i>)<br/>GGTGGCGAGGCGCACCGTGGGCTTGTACTIONCGG<br/>(anneals at the beginning of the puro-2A-DsRed gene in pTarget)</p>                                                         |                          |
| <p style="text-align: center;"><b>Right Junction</b></p> <p><i>FL-61</i></p> <p>GGACTTTCAAAATGTCGTAACAACACTCCGC<br/>(anneals at the 3'-end of the CMV promoter in pTarget)<br/>AAAGATGGATGATGTGCCTGAGATTCTGATCACAAGG<br/>(anneals at ~270 bp downstream from <i>FL-61</i>)</p> <p><i>FL-63</i></p> <p>CATCGGCATAGTATATCGGCATAGTATAATACGAC<br/>(anneals at the 5'-end of the recombination target cassette I in pTarget)<br/>CTTAGACAAAACCTGATCCCCAGGTTATTCCCATCAG<br/>(anneals at ~490 bp downstream from <i>FL-63</i>)</p> <p><i>FL-71</i></p> <p>GCAAACCTTTCGCGGTATGGCATGATAGCGCCC<br/>(anneals at the 5'-end of the recombination target cassette II in pTarget)<br/>CAATATGTGTACACATATTTAAACATTACACTTTAACC<br/>(anneals at ~115 bp downstream from <i>FL-71</i>)</p> |                          |

**Supplementary Table 4. *FRT*-like sequences in the human genome that were tested for potential off-target integration events.** The *FRT*-like sequences shown have the highest level of homology to *FRT* (Shultz et al., 2011) and their spacer sequences, which are highlighted in bold, are identical to that of *FL-61*, see Fig. 2b. The relative orientation of these *FRT*-like sequences (which is specified by the direction of their spacer sequences) is different in the human chromosomes but these sequences are arranged in such a way that the direction of their spacers matches that of *FL-61* (Fig. 2b).

| <i>FRT</i> -like sequence                               |
|---------------------------------------------------------|
| AACAATCCTATTCT <b>TGATAATA</b> AAAATAAAGCTGAT , Chr-01  |
| TATTATCATATTT <b>TGATAATA</b> AAAATATGATTTGA , Chr-01   |
| AGTTTTCCAATAT <b>TGATAAT</b> AGTATAAACAAGCA , Chr-01    |
| GATTGGGCAATTT <b>TGATAATA</b> AAAATAAGAATTCC , Chr-02   |
| ATGTTTCTGATACT <b>TGATAAT</b> AGTATAAGTGCCAA , Chr-02   |
| AGTTCGCAAATTCT <b>TGATAAT</b> AGAATTGCTCCTCT , Chr-03   |
| AGAATAATTATTCT <b>TGATAATA</b> AATATTAGTAATAA , Chr-03  |
| AATTTTCTTATTT <b>TGATAAT</b> AGTATAATGGTTAT , Chr-03    |
| TAAGTGAATATTT <b>TGATAATA</b> AAAATTGGAGATCA , Chr-04   |
| GCTTGCCTGATTCT <b>TGATAATA</b> AATATTCAAGCAAA , Chr-04  |
| AGTTTTCTTATAT <b>TGATAATA</b> AAAATTGTTAATGT , Chr-04   |
| GTTTCACATATAT <b>TGATAAT</b> AGTATCACCATATC , Chr-06    |
| TGACTTTTGATACT <b>TGATAAT</b> AGAATAAGCACATT , Chr-06   |
| ACCAGTATGATTCT <b>TGATAAT</b> AGAATAGGTTGAGT , Chr-08   |
| ACCAGTATCATTT <b>TGATAATA</b> AAAATCTGACAGAG , Chr-11   |
| TGCAAACAGATACT <b>TGATAAT</b> AGAATATGAAATAA , Chr-11   |
| CACCAATTGATACT <b>TGATAATA</b> AAAATATGTTTCATT , Chr-11 |
| TTTAGTATAATTT <b>TGATAATA</b> AAAATAAGAGTAAT , Chr-12   |
| TTTTCCAATATAT <b>TGATAATA</b> AAAATAGGTTTGCT , Chr-12   |

GATTCCTAATTT**TGATAA**TAGTATAGTGCTTAT, **Chr-13**  
 CAGTAAATGATAT**TGATAA**TAGTATAAGTACTGT, **Chr-14**  
 GTCTGTCATATT**TGATAA**TAAATATGATTTAATA, **Chr-14**  
 AAGACATCAATA**TGATAA**TAGTATATGATGTTA, **Chr-14**  
 AATATACTCATT**TGATAA**TAAAATATAGTATGC, **Chr-18**  
 TTGATATTAATAT**TGATAA**TAAATATCAGTATGTC, **Chr-21**  
 AGATAACCAATAT**TGATAA**TAAATATAATAATCAT, **Chr-X**  
 ATCTCTCTCATAT**TGATAA**TAAATATATCAATTGG, **Chr-X**  
 CATCAATTTATA**TGATAA**TAAAATTTGAATTTT, **Chr-X**  
 TATGGGATCATA**TGATAA**TAGTATAAGGGTTTCG, **Chr-Y**

**pTarget vector sequence (without recombination targets)**

GACGGATCGGGAGATCTCCCGATCCCCTATGGTCGACTCTCAGTACAATCTGCTCTGATGCCGCATAGTT  
 AAGCCAGTATCTGCTCCCTGCTTGTGTGTTGGAGGTCGCTGAGTAGTGCGCGAGCAAATTTAAGCTACA  
 ACAAGGCAAGGCTTGACCGACAATTGCATGAAGAATCTGCTTAGGGTTAGGCGTTTTGCGCTGCTTCG**CG**  
**ATGTACGGGCCAGATATACGCGTTGACATTGATTATTGACTAGTTATTAATAGTAATCAATTACGGGGTC**  
 ATTAGTTCATAGCCCATATATGGAGTTCGCGGTTACATAA**CTTACGGTAAATGGCCCGCTGGCTGACCG**  
 CCAACGACCCCGCCATTGACGTCAATAATGACGTATGTTCCCATAGTAACGCCAATAGGGACTTTCC  
 ATTGACGTCAATGGGTGGACTATTTACGGTAAACTGCCCACTTGGCAGTACATCAAGTGTATCATATGCC  
 AAGTACGCCCCCTATTGACGTCAATGACGGTAAATGGCCCGCTGGCATTATGCCCAGTACATGACCTTA  
 TGGGACTTTCTACTTGGCAGTACATCTACGTATTAGTCATCGCTATTACCATGGTGATGCGGTTTTGGC  
 AGTACATCAATGGGCGTGGATAGCGGTTTTGACTCACGGGGATTTCCAAGTCTCCACCCCATTGACGTCAA  
 TGGGAGTTTTGTTTTGGCACCAAAATCAACGGGACTTTCCA**AAATGTCGTAACA**ACTCCGCCCCATTGACG  
 CAAATGGGCGGTAGGCGTGTACGGTGGGAGGTCTATATAAGCAGAGCTCTCTGGCTAACTAGAGA**ACCCA**  
 CTGCTTACTGGCTTATCGAAATT**AATACGACTCACTATAGGGAGACCC****AAGCTT**

**Recombination target cassette I**

CTTCcctttgaaaaacacgatgataaatatggccacaacc**ATGGTGAGCAAGGGCGAGGAGCTGTTCCACCG**  
 GGGTGGTGCCCATCTGGTCGAGCTGGACGGCGACGTAAACGGCCACAAGTTCAGCGTGTCCGGCGAGGG  
 CGAGGGCGATGCCACCTACGGCAAGCTGACCCTGAAGTTCATCTGCACCACCGGCAAGCTGCCCGTGCC  
 TGGCCACCCTCGTGACCACCCTGACCCTACGGCGTGCAGTGCTTCAGCCGCTACCCGACCACATGAAGC  
 AGCAGACTTCTTCAAGTCCGCCATGCCCGAAGGCTACGTCCAGGAGCGCACCATCTTCTTCAAGGACGA  
 CGGCAACTACAAGACCCGCGCCGAGGTGAAGTTCGAGGGCGACACCCTGGTGAACCGCATCGAGCTGAAG  
 GGCATCGACTTCAAGGAGGACGGCAACATCCTGGGGCACAAGCTGGAGTACA**ACTACAACAGCCACAACG**



TCTATATCATGGCCGACAAGCAGAAGAACGGCATCAAGGTGAACTTCAAGATCCGCCACAACATCGAGGA  
CGGCAGCGTGCAGCTCGCCGACCACTACCAGCAGAACACCCCATCGGCGACGGCCCCGTGCTGCTGCC  
GACAACCACTACCTGAGCACCCAGTCCGCCCTGAGCAAAGACCCCAACGAGAAGCGCGATCACATGGTCC  
TGCTGGAGTTCGTGACCGCCGCCGGGATCACTCTCGGCATGGACGAGCTGTACAAGTAAAGCGGCCGCGA  
CTCTAGATCATAATCAGCCATACCACCTCGAGCATGCATCTAGAGGGCCCTATTCTATAGTGCACCTAA  
ATGCTAGAGCTCGCTGATCAGCCTCGACTGTGCCTTCTAGTTGCCAGCCATCTGTTGTTTGGCCCTCCCC  
CGTGCCTTCCTTGACCCTGGAAGGTGCCACTCCCACTGTCTTTCCTAATAAAAATGAGGAAATTGCATCG  
CATTGTCTGAGTAGGTGTCAATTCTATTCTGGGGGTGGGGTGGGGCAGGACAGCAAGGGGGAGGATTGGG  
AAGACAATAGCAGGCATGCTGGGGATGCGGTGGGCTCTATGGCTTCTGAGGCGGAAAGAACCAGCTGGGG  
CTCTAGGGGGTATCCCCACGCGCCCTGTAGCGGCGCATTAAAGCGCGGCGGGTGTGGTGGTTACGCGCAGC  
GTGACCGCTACACTTGCCAGCGCCCTAGCGCCCGCTCCTTTCGCTTTCCTTCCCTTCTTCTCGCCACGT  
TCGCCGGCTTTCCTCGTCAAGCTCTAAATCGGGGCATCCCTTTAGGGTTCGGATTTAGTGTCTTACGGCA  
CCTCGACCCAAAAAATTGATTAGGGTGTGGTTCACGTAGTGGGCCATCGCCCTGATAGACGGTTTTTT  
CGCCCTTTCGCTTGGAGTCCACGTTCTTTAATAGTGGACTCTTGTTCCAAACCTGGAACAACACTCAACC  
CTATCTCGGTCTATTCTTTTGATTTATAAGGGATTTTGGGGATTTTCGGCCTATTGGTTAAAAAATGAGCT  
GATTTAACAAAAATTTAACGCGAATTAATTCTGTGGAATGTGTGTCAGGTACCGTTTTATTCTGTCTTTT  
TATTGgcttctgatggaattagaacttggcaaaacaatactgagaatgaagtgtatgtggaacagaggct  
gctgatctcgttcttcaggctatgaaactgacacatttggaaaccacagtacttagaaccacaaagtggg  
aatcaagagaaaaacaatgatcccacgagagatctatagatctatagatcatgagtgaggaggaatgagct  
ggcccttaatttgggttttggcttgtttaattatgatatccaactatgaaacattatcataaagcaatagt  
aaagagccttcagtaagagcagggcatttatctaatacccacccccacccccacccccgtagctccaatcct  
tccattcaaaatgtaggtactctgttctcacccttcttaacaaagtatgacaggaaaaacttccatttta  
gtggacatctttattgtttaatagatcatcaatttctgcagacttacagcggatccccCTATTTCCTTTGC  
CCTCGACGAGTGTGCGGGCGTCCGTTTCCACTATCGGCGAGTACTTCTACACAGCCATCGGTCCAGACG  
GCCGCGCTTCTGCGGGCGATTTGTGTACGCCGACAGTCCCGCTCCGGATCGGACGATTGCGTGCATC  
GACCCTGCGCCAAAGCTGCATCATCGAAATTGCCGTCAACCAAGCTCTGATAGAGTTGGTCAAGACCAAT  
GCGGAGCATATACGCCCGGAGCCGCGGCGATCCTGCAAGCTCCGGATGCCTCCGCTCGAAGTAGCGGTC  
TGCTGCTCCATAACAAGCCAACCACGGCCTCCAGAAGAAGATGTTGGCGACCTCGTATTGGGAATCCCCGA  
ACATCGCCTCGCTCCAGTCAATGACCGCTGTTATGCGGCCATTGTCCGTGAGGACATTGTTGGAGCCGAA  
ATCCGCGTGCACGAGGTGCCGGACTTCGGGGCAGTCTCGGCCCAAAGCATCAGCTCATCGAGAGCCTGC  
GCGACGGACGCACTGACGGTGTCTCCATCACAGTTTGCCAGTGATACACATGGGGATCAGCAATCGCGC  
ATATGAAATCACGCCATGTAGTGTATTGACCGATTCTTTCGCGTCCGAATGGGCCGAACCCGCTCGTCTG  
GCTAAGATCGGCCGAGCGATCGCATCCATGGCCTCCGCGACCGGCTGCAGAACAGCGGGCAGTTCCGGTT  
TCAGGCAGGTCTTGCAACGTGACACCCTGTGCACGGCGGGAGATGCAATAGGTCAGGCTCTCGCTGAATT  
CCCCAATGTCAAGCACTTCCGGAATCGGGAGCGCGCCGATGCAAAGTGCCGATAAACATAACGATCTTT  
GTAGAAACCATCGGCGCAGCTATTTACCCGACAGGACATATCCACGCCCTCCTACATCGAAGCTGAAAGCA  
CGAGATTCTTCGCCCTCCGAGAGCTGCATCAGGTTCGAGACGCTGTGCAACTTTTCGATCAGAACTTCT  
CGACAGACGTTCGGTGAGTTTTCAGGCTTTTGGCCATgggtggcggcgat tgcaggtcgaaaggccggag  
atgaggaagaggagaacagcgcggcagacgtgcgcttttgaagcgtgcagaatgccgggacctccggagga  
ccttcggggcggccgccccgccccctgagcccgccccctgagcccgcccccggaaccaccccttcccagctc  
tgagccagaaaagcgaaggagcaaaagctgctattggcggctgccccaaaggcctaccgcttccattgct  
cagcgggtgctgtccatctgacgagactagtgagacgtgctacttccatttgtcacgtcctacgacgcgag  
ctgccccggggggggaacttccctgactaggggaggagagaaggtggcgcaagggggccaccaaaagaacg  
gagccggttggcgctaccggtggatgtggaatgtgtgcgaggccaaggccacttgtgtagcgccaagtg  
ccagcgggctgctaagcgcagctcagactgccttggaaaagcgcctcccctaccggtaCCTAGGtgc  
aaagatggataaagt ttaaacagagaggaatctt tgcagctaattggaccttctaggtcctgaaaggagt  
gcctcgtgaggctccggtgcccgtcagtgggcagagcgcacatcgcccacagtccccgagaagttggggg  
gaggggtcggcaattgaaccggtgcctagagaaggtggcgcggggtaaaactgggaaagtgatgtcgtgta  
ctggctccgcctttttcccgaggggtgggggagaaccgatatataagtgcagtagtcgccgtgaacgttctt  
tttcgcaacgggtttgcccgcagaacacaggttaagtgccgtgtgtggttcccgcgggacctggcctcttta  
cgggttatggcccttgcgtgccttgaattacttccacctggctgcagtagctgattcttgatcccagct  
tcgggttggaaagtgggtgggagagttcagggccttgcgcttaaggagcccttccgctcgtgcttgagtt

gaggcctggcctgggcgctggggccgcccgcgtgcgaatctggtggcaccttcgcgctgtctcgctgctt  
tcgataagtctctagccatttaaaatTTTTgatgacctgctgcgacgctTTTTTctggcaagatagtct  
tgtaaatgcccccaagatctgcacactggatttcggTTTTggggccgccccggcgacggggcccgt  
gcgctccagcgcacatgctcggcgaggcggggcctgcgagcgcggccaccgagaatcggacgggggtagt  
ctcaagctggccggcctgctctggtgctggcctcgcgcccgcgtgtatcgccccgcctgggcggaag  
gctggcccggctcggcaccagttgcgtgagcggaaagatggccgctcccggcctgctgcaggagctca  
aaatggaggacgcgcgctcgggagagcggcgggtagtcacccacacaaaggaaaaggccttccgt  
cctcagccgctcgttcatgtgactccacggagtagcggcgccgtccaggcacctcgattagttctcgag  
cttttgagtagctcgtcttttaggtggggggaggggttttatgcatggagttccccacactgagtg  
gtggagactgaagttagccagcttggcacttgatgtaattctccttggaaattgcccTTTTgagttg  
gatcttggttcattctcaagcctcagacagtggttcaaagTTTTTctccatttcaggtgctcgtgagg  
aattagcttggtaactaacgactcactataggagaccaagctggctagg

**Recombination target cassette II**

**GCTAGCATG**accgagtacaagcccacgggtgcgcctcgccacccgcgacgacgtccccgggcccgtacgca  
ccctcgccgcccgcgttcgccgactaccccgccacgcgccacaccgtcgacccggaccgccacatcgagcg  
ggtcaccgagctgcaagaactcttccctcacgcgcgtcgggctcgacatcggcaaggtgtgggtcgcggac  
gacggcgcgcccgggtggcggctctggaccacgcggagagcgtcgaagcggggggcggtgttcgccgagatcg  
gcccgcgcatggccgagttgagcgggtcccggctggcgcgcagcaacagatggaaggcctcctggcgcc  
gcaccggcccaaggagcccgcgtgggtcctggccaccgtcggcgtctcgcccgaccaccagggcaagggt  
ctgggcagcgcctgctgctcccggagtgaggcggccgagcgcgcgggggtgcccgccttctggaga  
cctccgcgccccgcaacctccccttctacgagcggctcggcttcaccgtcacccgcgacgtcgagtgcc  
cgaaggaccgcgcacctgggt**GCATGACCCGCAAGCCCGGTGCCTCTAGAAAAATTGTCGCTCCTGTCAA**  
**CAA**ACTCTTAACCTTTGATTTACTCAAACCTGGCTGGGGATGTAGAAAGCAATCCAGGGCCCCGCTCCTCCG  
**AGGACGTCATCAAGGAGTTCATGCGCTTCAAGGTGCGCATGGAGGGCTCCGTGAACGGCCACGAGTTCGA**  
**GATCGAGGGCGAGGGCGAGGGCCGCCCTACGAGGGCACCCAGACCCCAAGCTGAAGGTGACCAAGGGC**  
**GGCCCCCTGCCCTTCGCTGGGACATCCTGTCCCCCAGTTCAGTACGGCTCCAAGGTGTACGTGAAGC**  
**ACCCCGCCGACATCCCGACTACAAGAAGCTGTCTTCCCCGAGGGCTTCAAGTGGGAGCGCGTGATGAA**  
**CTTCGAGGACGGCGCGTGGTGACCGTGACCCAGGACTCCTCCCTcCAGGACGGCTCCTTCATCTACAAG**  
**GTGAAGTTCATCGGCGTGAACCTTCCCCTCCGACGGCCCCGTAATGCAGAAGAAGACTATGGGCTGGGAGG**  
**CCTCCACCGAGCGCTGTACCCCCGCGACGGCGTGCTGAAGGGCGAGATCCACAAGGCCCTGAAGCTGAA**  
**GGACGGCGGCCACTACTGGTGAGTTC**CAAGTCTATCTATATGGCCAAGAAGCCCGTGCAGCTGCCGGC  
**TACTACTACGTGGACTCCAAGCTGGACATCACCTCCCACAACGAGGACTACACCATCGTGGAGCAGTACG**  
**AGCGCGCCGAGGGCCGCCACCACCTGTTCTCT**GTA**AGGATCCGCGGGACTCTGGGGTTCGAAATGACCGAC**  
CAAGCGACGCCAACCTGCCATCACGAGATTT**CGAT**TCCACCCGCCCTTCTATGAAAGGTTGGGCTTCG  
GAATCGTTTTTCCGGGACGCCGGCTGGATGATCCTCAGCGCGGGATCTCATGCTGGAGTTCCTCGCCCA  
CCCCAACTTGTTTATTGCAGCTTATAATGGTTACAAATAAAGCAATAGCATCACAAATTTACAAAATAAA  
GCATTTTTTTACTGCATTCTAGTTGTGGTTTTGTCCAAACTCATCAATGTATCTTATCATGTCTGTATAC  
CGTCGACCTCTAGCTAGAGCTTGGCGTAATCATGGTCATAGCTGTTTCTGTGTGAAATTGTTATCCGCT  
CACAATTCACACAACATAACGAGCCGGAAGCATAAAGTGTAAGCCTGGGGTGCCTAATGAGTGAGCTAA  
CTCACATTAATTGCGTTGCGCTCACTGCCCCGCTTCCAGTCGGGAAACCTGTGCTGCCAGCTGCATTAAT  
GAATCGGCCAACCGCGCGGGGAGAGGCGTTTTGCGTATTGGGCGCTCTTCCGCTTCTCGCTCACTGACTC  
GCTGCGCTCGGTTCGGCTGCGGCGAGCGGTATCAGCTCACTCAAAGGCGGTAATACGGTTATCCACA  
GAATCAGGGGATAACGCAGGAAAGAACATGTGAGCAAAAGGCCAGCAAAAGGCCAGGAACCGTAAAAAGG  
CCGCGTTGCTGGCGTTTTTCCATAGGCTCCGCCCCCTGACGAGCATCACAAAAATCGACGCTCAAGTCA  
GAGGTGGCGAAACCCGACAGGACTATAAAGATAACAGGCGTTTTCCCCCTGGAAGCTCCCTCGTGCGCTCT  
CCTGTTCCGACCTGCCGCTTACCGGATACCTGTCCGCCTTTCTCCCTTCCGGGAAGCGTGGCGCTTTCTC  
AATGCTCACGCTGTAGGTATCTCAGTTCGGTGTAGGTGCTTCCGCTCCAAGCTGGGCTGTGTGCACGAACC  
CCCCGTTCCAGCCCGACCGCTGCGCCTTATCCGGTAACTATCGTCTTGAGTCCAACCCGGTAAGACACGAC  
TTATCGCCACTGGCAGCAGCCACTGGTAACAGGATTAGCAGAGCGAGGTATGTAGGCGGTGCTACAGAGT  
TCTTGAAGTGGTGGCCTAACTACGGCTACACTAGAAGGACAGTATTTGGTATCTGCGCTCTGCTGAAGCC  
AGTTACCTTCGAAAAAGAGTTGGTAGCTCTTGATCCGGCAAAACAAACCACCGCTGGTAGCGGTGGTTTT  
TTTGTTCGAAGCAGCAGATTACGCGCAGAAAAAAGGATCTCAAGAAGATCCTTTGATCTTTTCTACGG

GGTCTGACGCTCAGTGGAACGAAAACTCACGTTAAGGGATTTTGGTCATGAGATTATCAAAAAGGATCTT  
CACCTAGATCCTTTTAAATTA AAAATGAAGTTTTAAATCAATCTAAAGTATATATGAGTAAACTTGGTCT  
GACAGTTACCAATGCTTAATCAGTGAGGCACCTATCTCAGCGATCTGTCTATTTTCGTTTCATCCATAGTTG  
CCTGACTCCCCGTCGTGTAGATAACTACGATACGGGAGGGCTTACCATCTGGCCCCAGTGCTGCAATGAT  
ACCGCGAGACCCACGCTCACCGGCTCCAGATTTATCAGCAATAAAACCAGCCAGCCGGAAGGGCCGAGCGC  
AGAAGTGGTCTGCAACTTTATCCGCCTCCATCCAGTCTATTAATTGTTGCCGGGAAGCTAGAGTAAGTA  
GTTTCGCCAGTTAATAGTTTGC GCAACGTTGTTGCCATTGCTACAGGCATCGTGGTGTACGCTCGTCGTT  
TGGTATGGCTTCATTACGCTCCGGTTCCCAACGATCAAGGCGAGTTACATGATCCCCCATGTTGTGCAAA  
AAAGCGGTTAGCTCCTTCCGTCCTCCGATCGTTGTCAGAAGTAAGTTGGCCGAGTGTATCACTCATGG  
TTATGGCAGCACTGCATAATTCTTACTGTCATGCCATCCGTAAGATGCTTTTCTGTGACTGGTGAGTA  
CTCAACCAAGTCATTCTGAGAATAGTGTATGCGGCGACCGAGTTGCTCTTGCCCGCGTCAATACGGGAT  
AATACCGCGCCACATAGCAGAACTTTAAAAGTGTCTCATCTATTGAAAACGTTCTTCGGGGCGAAAACTCT  
CAAGGATCTTACCCTGTTGAGATCCAGTTCGATGTAACCCACTCGTGCACCCAACTGATCTTCAGCATC  
TTTTACTTTTACCAGCGTTTCTGGGTGAGCAAAAACAGGAAGGCAAAATGCCGCAAAAAGGGAAATAAGG  
GCGACACGGAAATGTTGAATACTCATACTCTTCTTTTCAATATATTGAAGCATTTATCAGGGTTATT  
GTCTCATGAGCGGATACATATTTGAATGTATTTAGAAAAATAAACAAATAGGGGTCCGCGCACATTTCC  
CCGAAAAGTGCCACCTGACGTC

**Recombination target cassettes I**

***FRT<sup>#</sup>/FL-61***

CATCGGCATAGTATATCGGCATAGTATAATACGACAAGGTGAGGAACTAAACC  
CCTATTCTTGTGTTTCACGACTGACATCACCGT GAAGTTCCTATAC TGATAATA  
GAAatGGcAtTgt CACTTCTTCCCTACTGCAACAGAAGCCCAGCT

***FRT<sup>#</sup>/FL-63***

CATCGGCATAGTATATCGGCATAGTATAATACGACAAGGTGAGGAACTAAACC  
ACAACCTCAAATTATGCATACCAGCTCT GAAGTTCCTATAC TGCACCTA GAATAATCCTTTT  
GTCTCTCCACATGGGTATGGGAGAGGC

**Recombination target cassette II**

***FL-71/FRT<sup>#</sup>***

tggTgcaaaacctttcgcggtatggcatgatagcgcgccggaagagagtcaattcagg  
GAGATACATTAAGTAACCTTAAAAAAAACCTTTACACAGTCTG cctagTaCatTAC  
TATTTGGA GTATAGGAACTTC TATTTGCATATTCATAATCTCCCTACTTTATTTTCT

**Supplementary Figure 5.** Partial sequencing traces of the diagnostic PCR bands shown in Figures 4B and 6B. **(A)** and **(B)**, FV61-TAL dependent integration of pTarget into *FL-61*; LJ and RJ, respectively. **(C)** and **(D)**, FV63-TAL dependent integration of pTarget into *FL-63*; LJ and RJ, respectively. **(E)** and **(F)**, FV71-TAL dependent integration of pTarget into *FL-71*; LJ and RJ, respectively. **(G)** FV71-TAL dependent deletion of pTarget and genomic sequences; RJ, respectively.

**(A) *FL-61* integration, LJ**

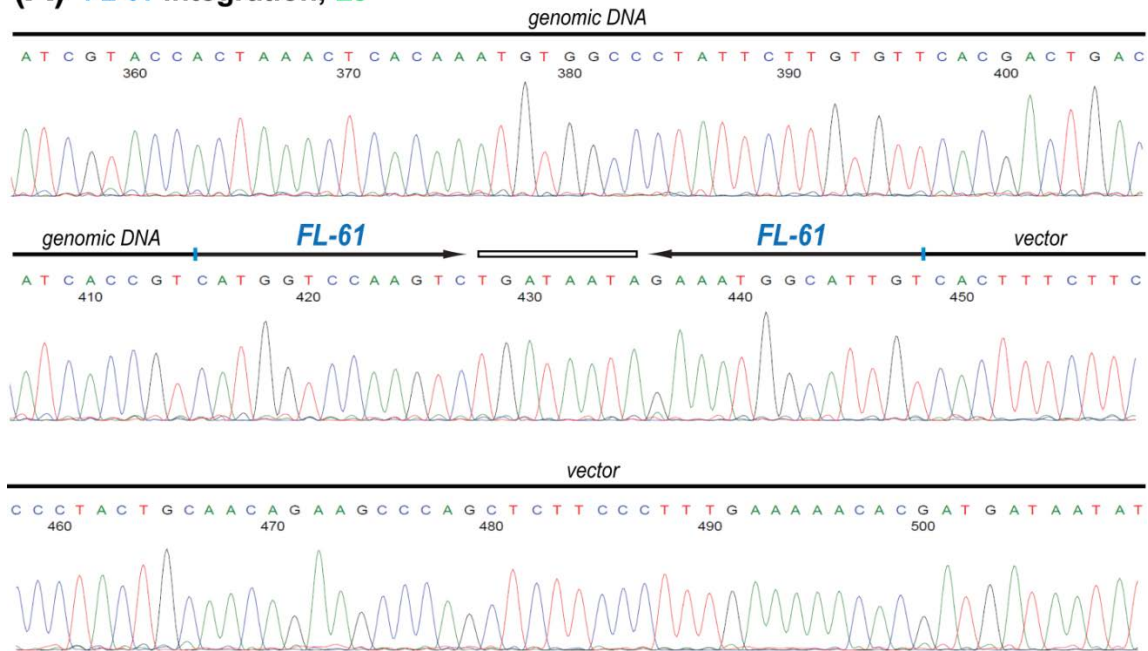

**(B) *FL-61* integration, RJ**

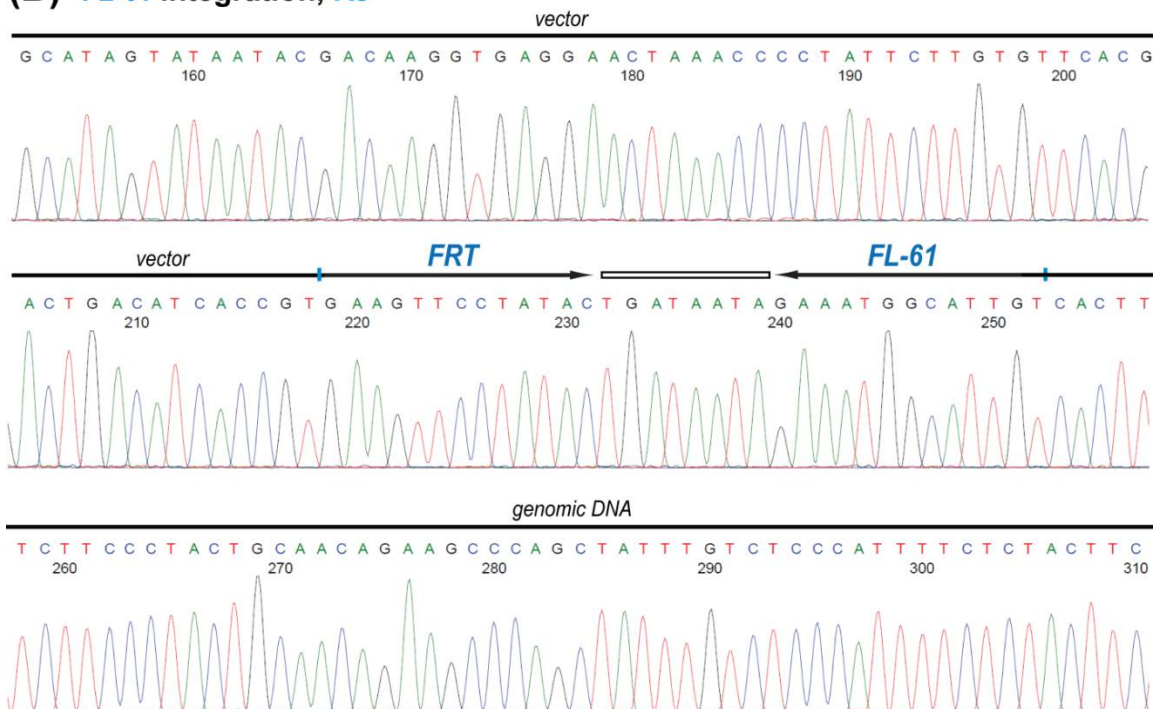

**(C) FL-63 integration, LJ**

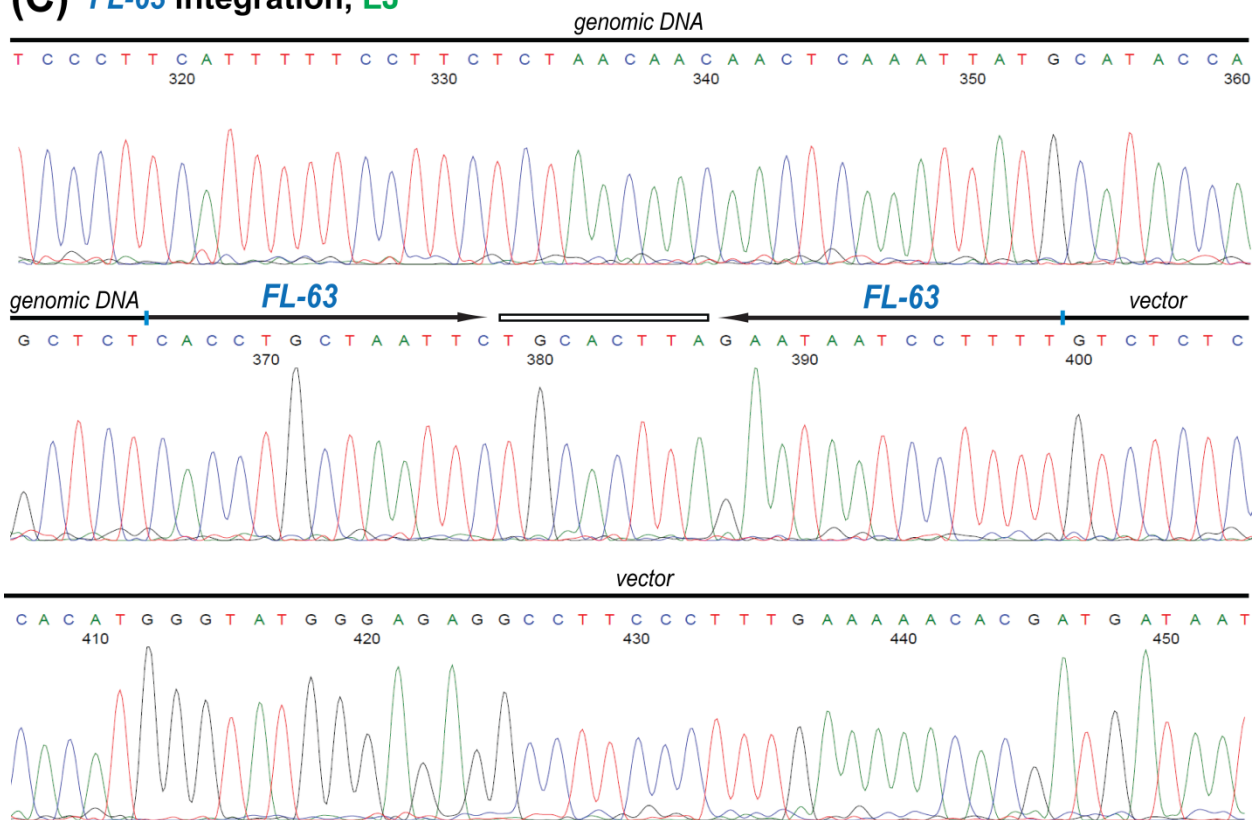

**(D) FL-63 integration, RJ**

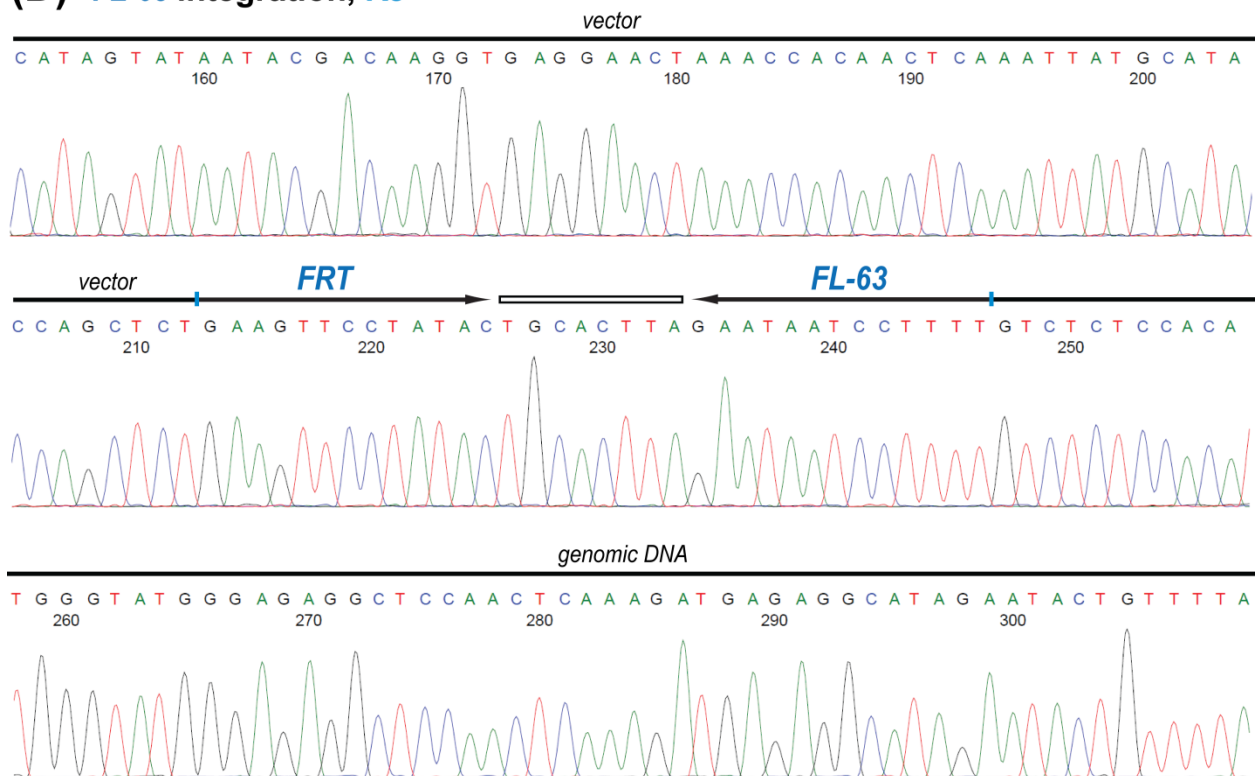

**(E) FL-71 integration, LJ**

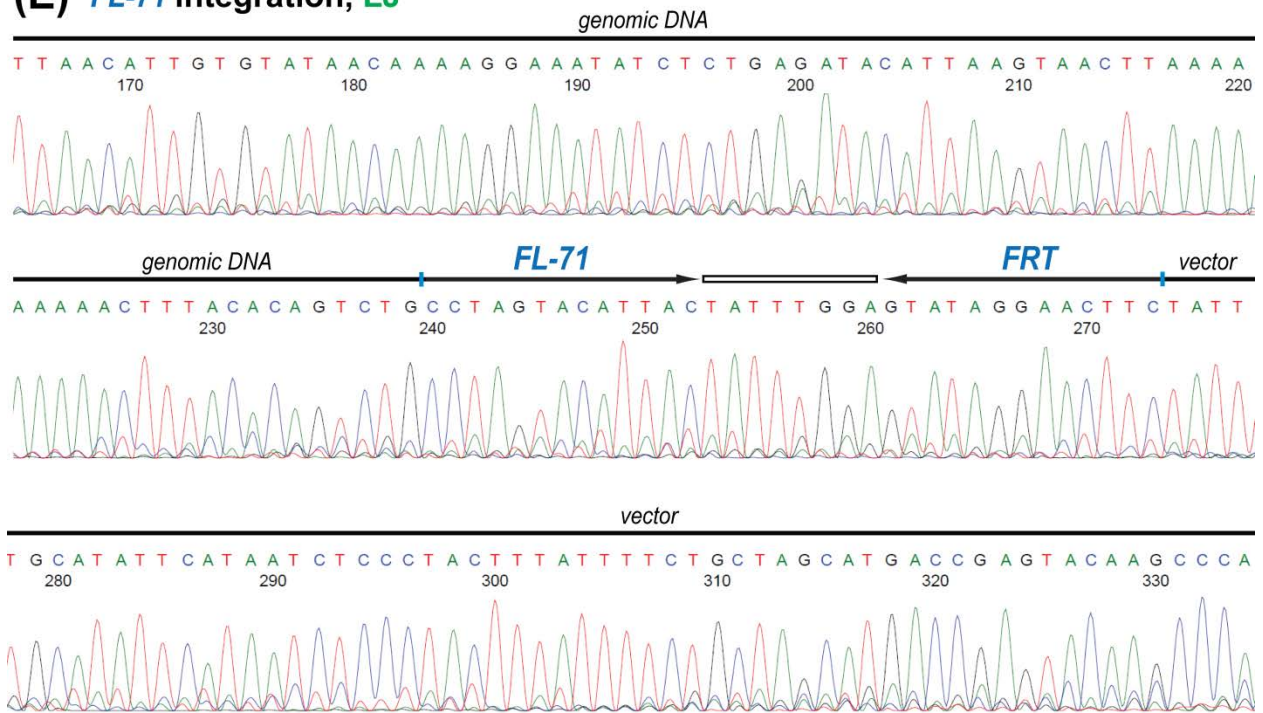

**(F) FL-71 integration, RJ**

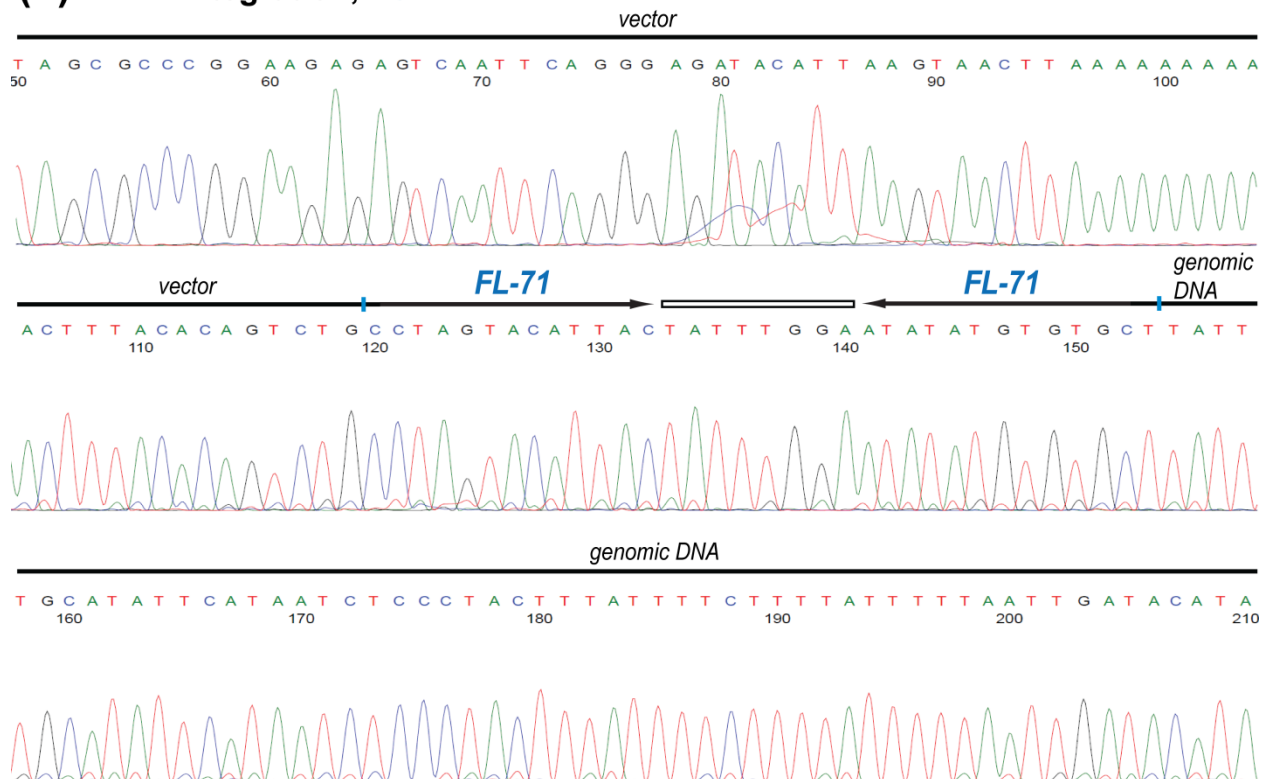



**(G) FL-71 deletion, RJ**

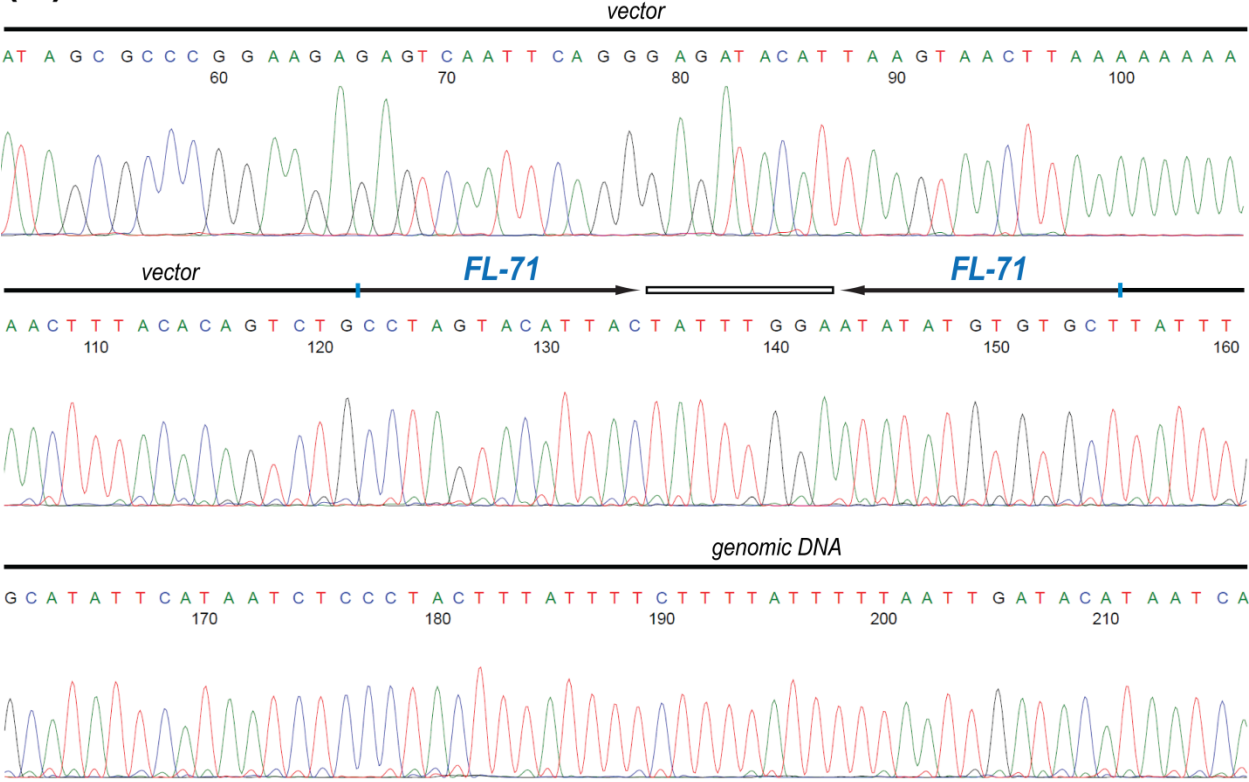

**Supplementary Figure 6.** Original images of the gels.

**Figure 3E.**

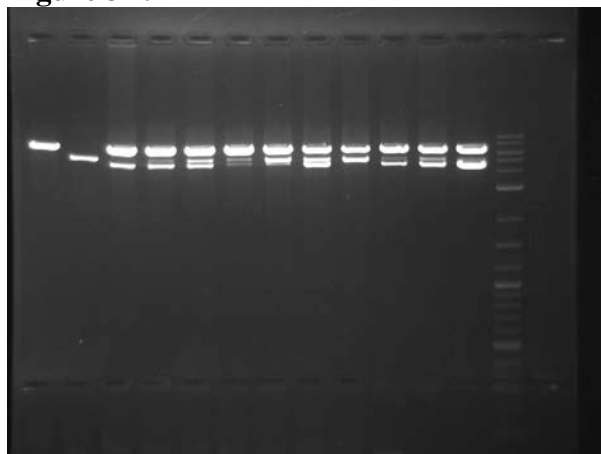

**Figure 4B.**

**LJ**

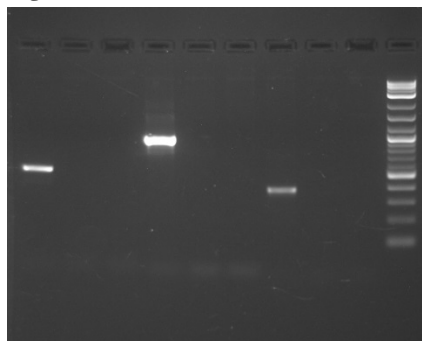

**RJ**

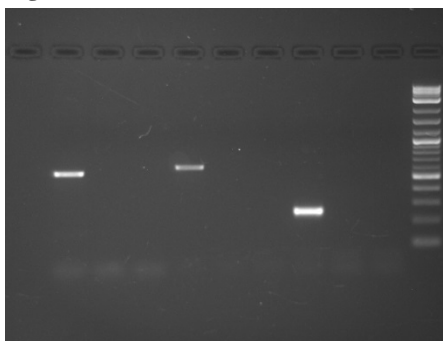

**Figure 4D.**

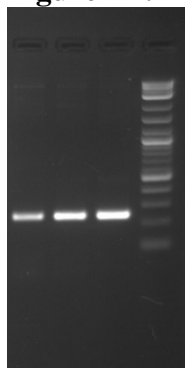



**Figure 5A and B.**

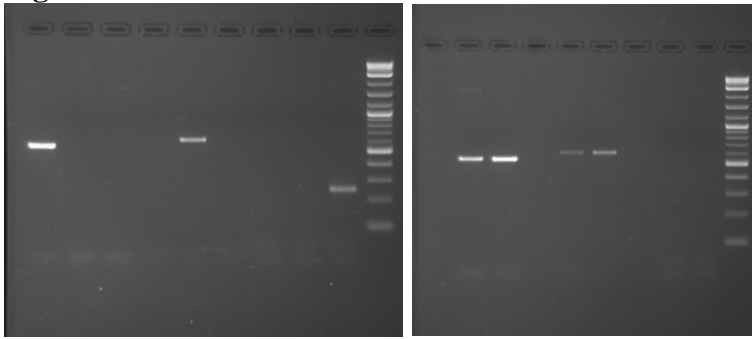

**Figure 6B.**

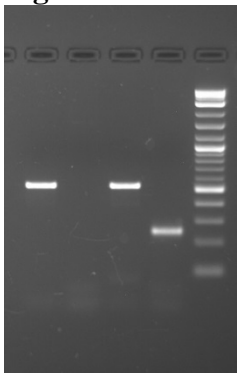

**Supplementary Figure 3A, B, and C.**

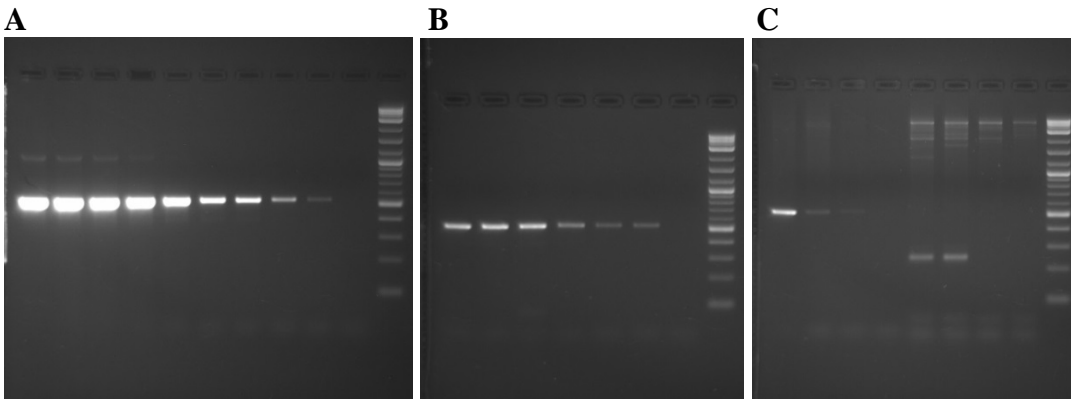

**Supplementary Figure 4A.**

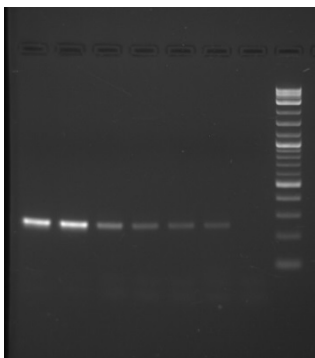

Supplement: 41598_2020_74474_MOESM1_ESM.pdf [file 41598_2020_74474_MOESM1_ESM.pdf]
